# Supplementary material for: Microwave-assisted synthesis of new fluorinated coumarin–pyrimidine hybrids as potent anticancer agents, their DNA cleavage and X-ray crystal studies
Source: Royal Society of Chemistry journal article supplement (doi:10.1039/c4ra12222d), 2015-01-01

## Supporting Information

### Microwave-assisted synthesis of new fluorinated coumarin-pyrimidine hybrids as potent anticancer agents, their DNA cleavage and X-ray crystal studies

\*K. M. Hosamani<sup>a</sup>, Dinesh Shrikant Reddy<sup>a</sup> and H. C. Devarajegowda<sup>b</sup>

<sup>a</sup>Department of Studies in Chemistry, Karnatak University Dharwad, Dharwad-580003, India

<sup>b</sup>Department of Physics, Yuvaraja's College, University of Mysore, Mysore-570005, India

---

#### Contents:

|                                                                                                                |         |
|----------------------------------------------------------------------------------------------------------------|---------|
| 1) X-ray crystal data of compound ( <b>1a</b> )                                                                | S2      |
| 2) <b>Table-S1.</b> Crystal data, Data collection and Structure refinement of compound ( <b>1a</b> )           | S3      |
| 3) <b>Table-S2.</b> Selected equivalent isotropic displacement parameters ( $\text{\AA}^2$ ) for ( <b>1a</b> ) | S4      |
| 4) <b>Table-S3.</b> Selected atomic displacement parameter ( $\text{\AA}$ ) for ( <b>1a</b> )                  | S4      |
| 5) <b>Table-S4.</b> Selected Bond lengths ( $\text{\AA}$ ) and angles ( $^\circ$ ) for ( <b>1a</b> )           | S5      |
| 6) X-ray crystal data of compound ( <b>1b</b> )                                                                | S6      |
| 7) <b>Table-S5.</b> Crystal data, Data collection and Structure refinement of compound ( <b>1b</b> )           | S6-S7   |
| 8) <b>Table-S6.</b> Selected equivalent isotropic displacement parameters ( $\text{\AA}^2$ ) for ( <b>1b</b> ) | S7      |
| 9) <b>Table-S7.</b> Selected atomic displacement parameter ( $\text{\AA}^2$ ) for ( <b>1b</b> )                | S8      |
| 10) <b>Table-S8.</b> Selected Bond lengths ( $\text{\AA}$ ) and angles ( $^\circ$ ) for ( <b>1b</b> )          | S8-S9   |
| 11) $^1\text{H}$ and $^{13}\text{C}$ NMR spectrum of compounds ( <b>1a-11</b> )                                | S10-S21 |

### X-ray crystal data of compound (**1a**)

**Table S1** presents crystallographic data and X-ray structure parameters. Measurements were made using Bruker SMART CCD area-detector diffractometer with monochromatic Mo  $K\alpha$  radiation at room temperature. The crystalline state of a crystal is characterized by a long range, well defined three dimensional orders. Data collection: SMART (Bruker, 2001); cell refinement: SAINT (Bruker, 2001); data reduction: SAINT; program(s) used to solve structure: SHELXS97 ; molecular graphics: ORTEP-3; software used to prepare material for publication: SHELXL97. E-map provided positions for all non H-atoms. The full-matrix least-squares refinement was carried out on  $F^2$  using anisotropic temperature factors for all non H-atoms. The H-atoms were located from DF-maps, and then their positions were refined using a riding model with isotropic thermal parameters taken as 1.2 times temperature factors for their parent-atoms. The ORTEPs of these isomers were obtained by the PLATON program. Coordinates were deposited in the Cambridge Crystallographic Data Centre with deposit number CCDC-897297.

**Table-S1:** Crystal data, Data collection and Structure refinement of compound (1a)

|                                   |                                                                                                                                                                       |
|-----------------------------------|-----------------------------------------------------------------------------------------------------------------------------------------------------------------------|
| Empirical formula                 | C <sub>27</sub> H <sub>19</sub> FN <sub>2</sub> O <sub>2</sub>                                                                                                        |
| Formula weight                    | 422.44                                                                                                                                                                |
| Temperature                       | 293(2) K                                                                                                                                                              |
| Wavelength                        | 0.71073 Å                                                                                                                                                             |
| Crystal system, space group       | Triclinic P-1                                                                                                                                                         |
| Unit cell dimensions              | a = 8.0072(3)Å<br>b = 10.1043(4)Å<br>c = 13.2110(5)Å<br>α = 100.264(2)°, β = 90.006(2)°<br>γ = 93.327(3)°                                                             |
| Volume                            | 1049.93(7)Å <sup>3</sup>                                                                                                                                              |
| Z                                 | 2                                                                                                                                                                     |
| Calculated density                | 1.336mg/m <sup>3</sup>                                                                                                                                                |
| Crystal size                      | 0.22 × 0.15 × 0.12 mm                                                                                                                                                 |
| Absorption coefficient            | 0.091mm <sup>-1</sup>                                                                                                                                                 |
| F(000)                            | 440                                                                                                                                                                   |
| Crystal form                      | Prism, colourless                                                                                                                                                     |
| Radiation source                  | fine-focus sealed tube                                                                                                                                                |
| Radiation type                    | Mo Kα                                                                                                                                                                 |
| Radiation monochromator           | graphite                                                                                                                                                              |
| Criterion for observed reflection | I > 2σ(I)                                                                                                                                                             |
| <b>Data collection</b>            |                                                                                                                                                                       |
| Diffractometer                    | Bruker SMART CCD area-detector                                                                                                                                        |
| Data collection method            | ω-χ scans                                                                                                                                                             |
| Absorption correction             | multi-scan                                                                                                                                                            |
| Theta range for data collection   | 1.57 to 23.64°                                                                                                                                                        |
| Limiting indices                  | -9 ≤ h ≤ 8, -11 ≤ k ≤ 10, -14 ≤ l ≤ 14                                                                                                                                |
| Reflections collected / unique    | 3127 / 2458 [R(int) = 0.0200]                                                                                                                                         |
| Completeness to theta             | 99.4 %                                                                                                                                                                |
| Max. and min. transmission        | T <sub>max</sub> = 1.000, T <sub>min</sub> = 0.790                                                                                                                    |
| <b>Refinement</b>                 |                                                                                                                                                                       |
| Refinement method                 | Full-matrix least-squares on F <sup>2</sup>                                                                                                                           |
| Data / restraints / parameters    | 2458 / 0 / 290                                                                                                                                                        |
| Goodness-of-fit on F <sup>2</sup> | 1.07                                                                                                                                                                  |
| Final R indices [I > 2σ(I)]       | R1 = 0.0470, wR2 = 0.1375                                                                                                                                             |
| R indices (all data)              | R1 = 0.0593, wR2 = 0.1472                                                                                                                                             |
| Weighting scheme                  | ω = 1/[σ <sup>2</sup> (F <sub>o</sub> <sup>2</sup> ) + (0.0714P) <sup>2</sup> + 0.2386P]<br>Where P = (F <sub>o</sub> <sup>2</sup> + 2F <sub>c</sub> <sup>2</sup> )/3 |
| (Δ/σ)max                          | < 0.001                                                                                                                                                               |
| Largest diff. peak and hole       | 0.284 and -0.155e.Å <sup>-3</sup>                                                                                                                                     |

**Table-S2:** Selected equivalent isotropic displacement parameters ( $\text{\AA}^2$ ) for (**1a**)

|    | <b>x</b>    | <b>y</b>    | <b>z</b>          | <b>Uiso*/Ueq</b> |
|----|-------------|-------------|-------------------|------------------|
| F1 | 0.7866(3)   | 0.1243(2)   | 0.4<br>32<br>(12) | 0.1726 (10)      |
| O2 | 0.93813(17) | 0.80366(12) | 0.98952(10)       | 0.0638 (4)       |
| O3 | 0.80510(19) | 0.74700(14) | 1.12113(11)       | 0.0756 (5)       |
| N4 | 0.5307(2)   | 0.25470(14) | 1.06110(11)       | 0.0560 (4)       |
| N5 | 0.7030 (2)  | 0.35088(14) | 0.94376(11)       | 0.0552(4)        |
| C6 | 0.8502(2)   | 0.70883(19) | 1.03431(15)       | 0.0558(5)        |
| C7 | 0.8210(2)   | 0.57545(17) | 0.97205(13)       | 0.0465(4)        |
| H8 | 0.8708      | 0.4636      | 0.8388            | 0.059*           |

**Table-S3:** Selected atomic displacement parameter (  $\text{\AA}^2$  ) for (**1a**)

|     | $U_{11}$    | $U_{22}$    | $U_{33}$    | $U_{12}$     | $U_{13}$     | $U_{23}$    |
|-----|-------------|-------------|-------------|--------------|--------------|-------------|
| F1  | 0.3 12 (3)  | 0.1400 (16) | 0.0658 (10) | -0.0224 (17) | 0.0577 (14)  | 0.0295 (10) |
| O2  | 0.0749 (9)  | 0.0468 (8)  | 0.0634 (9)  | -0.0121 (6)  | 0.0109 (7)   | -0.0018 (6) |
| O3  | 0.0930 (11) | 0.0610 (9)  | 0.0607 (9)  | -0.0213 (7)  | 0.0191 (8)   | -0.0133 (7) |
| N4  | 0.0769 (11) | 0.0421 (9)  | 0.0468 (9)  | -0.0028 (7)  | 0.0058 (7)   | 0.0035 (7)  |
| N5  | 0.0743 (10) | 0.03 83(9)  | 0.0507 (9)  | -0.00 14 (7) | 0.0065 (7)   | 0.0034 (7)  |
| C6  | 0.0562 (11) | 0.0516 (11) | 0.0554 (12) | -0.0053 (9)  | 0.0049 (9)   | 0.0007 (9)  |
| C7  | 0.0488 (10) | 0.0428 (10) | 0.0465 (10) | 0.0015 (8)   | -0.0009 (8)  | 0.0048 (8)  |
| C8  | 0.0558 (11) | 0.0424 (10) | 0.0488 (11) | 0.0001 (8)   | -0.0005 (8)  | 0.0049 (8)  |
| C9  | 0.0484 (10) | 0.0495 (11) | 0.0523 (11) | 0.0019 (8)   | -0.0003 (8)  | 0.0101 (8)  |
| C28 | 0.0828 (16) | 0.0698 (14) | 0.0653 (14) | -0.0021 (11) | -0.0027 (11) | 0.0026 (11) |
| C29 | 0.104 (2)   | 0.0925 (19) | 0.087 (2)   | -0.0118 (15) | 0.0334 (17)  | 0.0059 (15) |
| C30 | 0.162 (3)   | 0.0644 (15) | 0.0542 (15) | -0.0120 (17) | 0.0241 (18)  | 0.0146 (11) |
| C31 | 0.151 (3)   | 0.0575 (14) | 0.0664 (16) | 0.0023 (15)  | -0.0293 (17) | 0.0058 (11) |

---

|     |             |             |             |              |              |              |
|-----|-------------|-------------|-------------|--------------|--------------|--------------|
| C32 | 0.0845 (15) | 0.0491 (12) | 0.0834 (17) | -0.0056 (10) | -0.0002 (13) | -0.0022 (11) |
|-----|-------------|-------------|-------------|--------------|--------------|--------------|

---

**Table-S4:** Selected Bond lengths (Å) and angles (°) for (**1a**)

---

|                 |             |                 |              |
|-----------------|-------------|-----------------|--------------|
| F1-C30          | 1.354 (3)   | C19-C20         | 1.384 (3)    |
| O2-C10          | 1.372 (2)   | C19-C24         | 1.384 (2)    |
| O2-C6           | 1.374 (2)   | C20-C21         | 1.374 (3)    |
| O3-C6           | 1.206 (2)   | C20-H20         | 0.93         |
| N4-C16          | 1.331 (2)   | C21-C22         | 1.382 (3)    |
| N4-C17          | 1.338 (2)   | C21-H21         | 0.93         |
| N5-C16          | 1.327 (2)   | C22-C23         | 1.380 (3)    |
| C6-C7           | 1.455 (2)   | C23-C24         | 1.378 (3)    |
| C7-C8           | 1.347 (2)   | C23-H23         | 0.93         |
| C8-C9           | 1.421 (2)   | C25-H25A        | 0.96         |
| C10-O2-C6       | 123.48 (14) | C21-C20-C19     | 121.50 (17)  |
| C16-N4-C17      | 116.89 (15) | C21-C20-H20     | 119.2        |
| C16-N5-C15      | 116.87 (15) | C19-C20-H20     | 119.2        |
| O3-C6-O2        | 115.55 (16) | C20-C21-C22     | 121.24 (18)  |
| O2-C10-C11      | 118.37 (17) | C22-C25-H25A    | 109.5        |
| O2-C10-C9       | 120.07 (16) | C22-C25-H25B    | 109.5        |
| N5-C16-N4       | 126.41 (15) | C30-C29-C28     | 118.5 (3)    |
| N5-C16-C26      | 117.91 (16) | C30-C29-H29     | 120.7        |
| N4-C16-C26      | 115.66 (16) | C28-C29-H29     | 120.7        |
| N4-C17-C18      | 120.54 (15) | C31-C30-C29     | 122.3 (2)    |
| N4-C17-C19      | 116.40 (15) | C31-C30-F1      | 118.8 (3)    |
| C28-C29-C30-F1  | -178.9 (2)  | C28-C27-C32-C31 | 0.7 (3)      |
| C29-C30-C31-C32 | -1.3 (4)    | C26-C27-C32-C31 | -178.91 (17) |
| F1-C30-C31-C32  | 178.78 (19) | C30-C31-C32-C27 | 0.3 (3)      |

---

C31-C30-F1

118.8 (3)

C29-C30-F1

118.9 (3)

---

X-ray crystal data of compound (**1b**)

**Table S5** presents crystallographic data and X-ray structure parameters. Measurements were made using Bruker SMART CCD area-detector diffractometer with monochromatic Mo  $K\alpha$  radiation at room temperature. The crystalline state of a crystal is characterized by a long range, well defined three dimensional orders. E-map provided positions for all non H-atoms. The full-matrix least-squares refinement was carried out on  $F^2$  using anisotropic temperature factors for all non H-atoms. The H-atoms were located from DF-maps, and then their positions were refined using a riding model with isotropic thermal parameters taken as 1.2 times temperature factors for their parent-atoms. The ORTEPs of these isomers were obtained by the PLATON program. Coordinates were deposited in the Cambridge Crystallographic Data center with deposit number. CCDC-897298

**Table-S5:** Crystal data, Data collection and Structure refinement of compound (**1b**)

|                   |                       |
|-------------------|-----------------------|
| Empirical formula | $C_{27}H_{19}FN_2O_3$ |
| Formula weight    | 438.44                |

|                                      |                                                                                                                                               |
|--------------------------------------|-----------------------------------------------------------------------------------------------------------------------------------------------|
| Temperature                          | 293(2) K                                                                                                                                      |
| Wavelength                           | 0.71073 Å                                                                                                                                     |
| Crystal system, space group          | Triclinic P-1                                                                                                                                 |
| Unit cell dimensions                 | a = 8.1330(2)Å<br>b = 10.2945(2)Å<br>c = 12.7544(3)Å<br>$\alpha = 101.192(1)^\circ$ , $\beta = 90.344(1)^\circ$<br>$\gamma = 95.499(1)^\circ$ |
| Volume                               | 1042.40(4)Å <sup>3</sup>                                                                                                                      |
| Z                                    | 2                                                                                                                                             |
| Calculated density                   | 1.397mg/m <sup>3</sup>                                                                                                                        |
| Crystal size                         | 0.22 × 0.15 × 0.12 mm                                                                                                                         |
| Absorption coefficient               | 0.098mm <sup>-1</sup>                                                                                                                         |
| F(000)                               | 456                                                                                                                                           |
| Crystal form                         | Prism, colourless                                                                                                                             |
| Radiation source                     | fine-focus sealed tube                                                                                                                        |
| Radiation type                       | Mo K $\alpha$                                                                                                                                 |
| Radiation monochromator              | graphite                                                                                                                                      |
| Criterion for observed reflection    | I > 2 $\sigma$ (I)                                                                                                                            |
| <b>Data collection</b>               |                                                                                                                                               |
| Diffractionmeter                     | Bruker SMART CCD area-detector                                                                                                                |
| Data collection method               | $\omega$ - $\chi$ scans                                                                                                                       |
| Absorption correction                | multi-scan                                                                                                                                    |
| Theta range for data collection      | 1.63to 24.99°                                                                                                                                 |
| Limiting indices                     | -9 ≤ h ≤ 9, -12 ≤ k ≤ 12, -15 ≤ l ≤ 15                                                                                                        |
| Reflections collected / unique       | 17307 / 3656 [R(int) = 0.0210]                                                                                                                |
| Completeness to theta                | 99.8 %                                                                                                                                        |
| Max. and min. transmission           | T <sub>max</sub> = 1.000, T <sub>min</sub> = 0.790                                                                                            |
| <b>Refinement</b>                    |                                                                                                                                               |
| Refinement method                    | Full-matrix least-squares on F <sup>2</sup>                                                                                                   |
| Data / restraints / parameters       | 3656 / 0 / 298                                                                                                                                |
| Goodness-of-fit on F <sup>2</sup>    | 1.078                                                                                                                                         |
| Final R indices [I > 2 $\sigma$ (I)] | R1 = 0.0382, wR2 = 0.1056                                                                                                                     |
| R indices (all data)                 | R1 = 0.0469, wR2 = 0.1119                                                                                                                     |
| Weighting scheme                     | $\omega = 1/[\sigma^2(F_o^2) + (0.0714P)^2 + 0.2386P]$<br>Where $P = (F_o^2 + 2F_c^2)/3$                                                      |
| ( $\Delta$ / $\sigma$ )max           | < 0.001                                                                                                                                       |
| Largest diff. peak and hole          | 0.123 and -0.186e.Å <sup>-3</sup>                                                                                                             |

**Table-S6:** Selected equivalent isotropic displacement parameters ( $\text{Å}^2$ ) for (1b)

| x | y | z | Uiso*/Ueq |
|---|---|---|-----------|
|---|---|---|-----------|

|    |               |              |               |           |
|----|---------------|--------------|---------------|-----------|
| F1 | 0.29852 (16)  | 0.57836 (12) | -0.51580 (7)  | 0.1023    |
| O2 | 0.44489 (13)  | 1.30511 (9)  | -0.00621 (8)  | 0.0581    |
| O3 | 0.30648 (15)  | 1.25194 (10) | 0.12785 (8)   | 0.0740    |
| O4 | -0.28759 (16) | 0.91129 (11) | 0.52642 (9)   | 0.0790    |
| N5 | 0.02512 (15)  | 0.76412 (11) | 0.06938 (8)   | 0.0519    |
| N6 | 0.19990 (14)  | 0.85324 (10) | -0.05386 (8)  | 0.0501    |
| C7 | 0.35284 (17)  | 1.21221 (14) | 0.03901 (11)  | 0.0520    |
| C8 | 0.32221 (15)  | 1.07790 (12) | -0.02585 (10) | 0.0440    |
| C9 | 0.38842 (16)  | 1.05192 (13) | -0.12347 (10) | 0.0471(3) |
| H9 | 0.3698        | 0.9662       | -0.164        | 0.056*    |

**Table-S7:** Selected atomic displacement parameter ( $\text{\AA}^2$ ) for (**1b**)

|    | $U_{11}$    | $U_{22}$   | $U_{33}$   | $U_{12}$    | $U_{13}$    | $U_{23}$    |
|----|-------------|------------|------------|-------------|-------------|-------------|
| F1 | 0.1393 (10) | 0.1083 (9) | 0.0555 (6) | -0.0045 (7) | 0.0328 (6)  | 0.0139 (5)  |
| O2 | 0.0680 (6)  | 0.0445 (5) | 0.0560 (6) | -0.0046 (4) | 0.0127 (5)  | -0.0002 (4) |
| O3 | 0.0925 (8)  | 0.0577 (6) | 0.0586 (6) | -0.0151 (6) | 0.0261 (6)  | -0.0108 (5) |
| O4 | 0.1016 (9)  | 0.0683 (7) | 0.0634 (7) | -0.0029 (6) | 0.0354 (6)  | 0.0083 (5)  |
| N5 | 0.0658 (7)  | 0.0432 (6) | 0.0449 (6) | 0.00 14 (5) | 0.0057 (5)  | 0.0061 (5)  |
| N6 | 0.0624 (7)  | 0.0403 (6) | 0.0458 (6) | 0.0033 (5)  | 0.0053 (5)  | 0.0051 (5)  |
| C7 | 0.0529 (8)  | 0.0476 (7) | 0.0519 (8) | -0.0011 (6) | 0.0077 (6)  | 0.0039 (6)  |
| C8 | 0.0453 (7)  | 0.0419 (7) | 0.0440 (7) | 0.0058 (5)  | -0.0006 (5) | 0.0057 (5)  |
| C9 | 0.0525 (7)  | 0.0419 (7) | 0.0461 (7) | 0.0072 (6)  | 0.0006 (6)  | 0.0054 (5)  |



|     |             |             |             |             |            |            |
|-----|-------------|-------------|-------------|-------------|------------|------------|
| C10 | 0.0457 (7)  | 0.0467 (7)  | 0.0473 (7)  | 0.0084 (6)  | 0.0022 (5) | 0.0096 (6) |
| C11 | 0.0479 (7)  | 0.0506 (7)  | 0.0491 (7)  | 0.0059 (6)  | 0.0039 (6) | 0.0087 (6) |
| C12 | 0.0662 (9)  | 0.0514(8)   | 0.0673 (9)  | -0.0026 (7) | 0.0050 (7) | 0.0128 (7) |
| C13 | 0.0679 (10) | 0.0685 (10) | 0.0677 (10) | -0.0018 (8) | 0.0088 (8) | 0.0270 (8) |
| C14 | 0.0673 (9)  | 0.0781 (11) | 0.0546 (9)  | 0.0081 (8)  | 0.0127 (7) | 0.0208 (8) |

**Table-S8:** Selected Bond lengths ( $\text{\AA}$ ) and angles ( $^\circ$ ) for (**1b**)

|            |             |              |             |
|------------|-------------|--------------|-------------|
| F1-C24     | 1.3615 (16) | C18-C27      | 1.4757 (17) |
| O2-C11     | 1.3743 (16) | C19-H19      | 0.93        |
| O2-C7      | 1.3748 (17) | C20-C21      | 1.5043 (18) |
| O3-C7      | 1.2033 (16) | C20-H20A     | 0.97        |
| O4-C30     | 1.3647 (16) | C20-H20B     | 0.97        |
| O4-C33     | 1.417 (2)   | C21-C26      | 1.375 (2)   |
| N5-C17     | 1.3378 (16) | C21-C22      | 1.380 (2)   |
| N5-C18     | 1.3377 (16) | C22-C23      | 1.376 (2)   |
| N6-C17     | 1.3249 (17) | C22-H22      | 0.93        |
| C11-O2-C7  | 123.61 (10) | C21-C20-H20B | 108.2       |
| C30-O4-C33 | 117.65 (13) | C17-C20-H20B | 108.2       |
| C25VC24VF1 | 118.72 (16) | C17-N6-C16   | 116.65 (11) |
| O3-C7-O2   | 115.43 (12) | C26-C21-C20  | 120.97 (15) |
| N5-C17-C20 | 114.21 (11) | C31-C32-C27  | 121.17 (13) |

**<sup>1</sup>H NMR spectrum of compound (1a)**

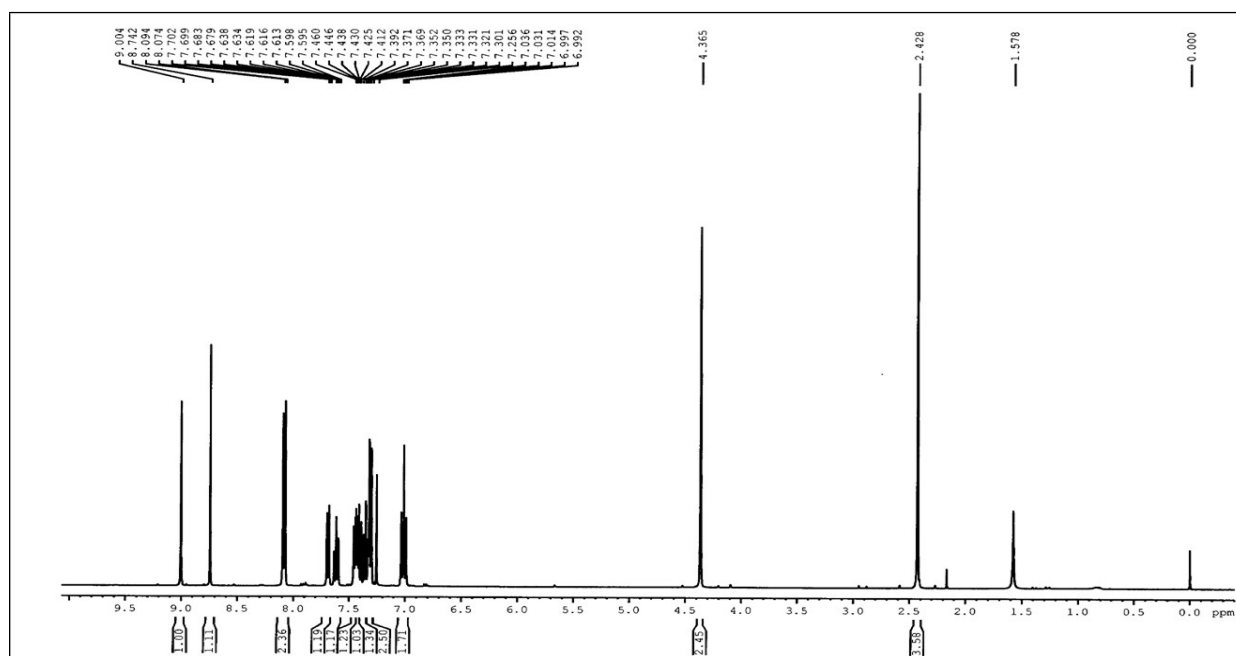

### <sup>13</sup>C NMR spectrum of compound (1a)

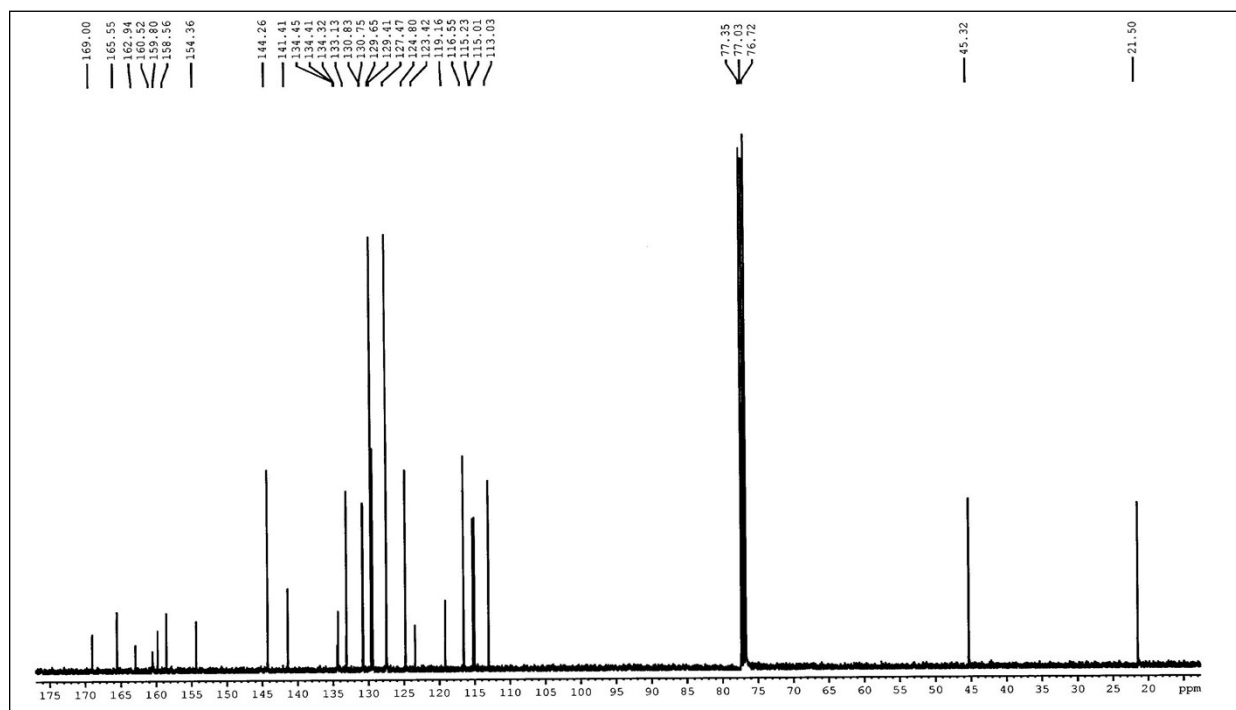

### <sup>1</sup>H NMR spectrum of compound (1b)

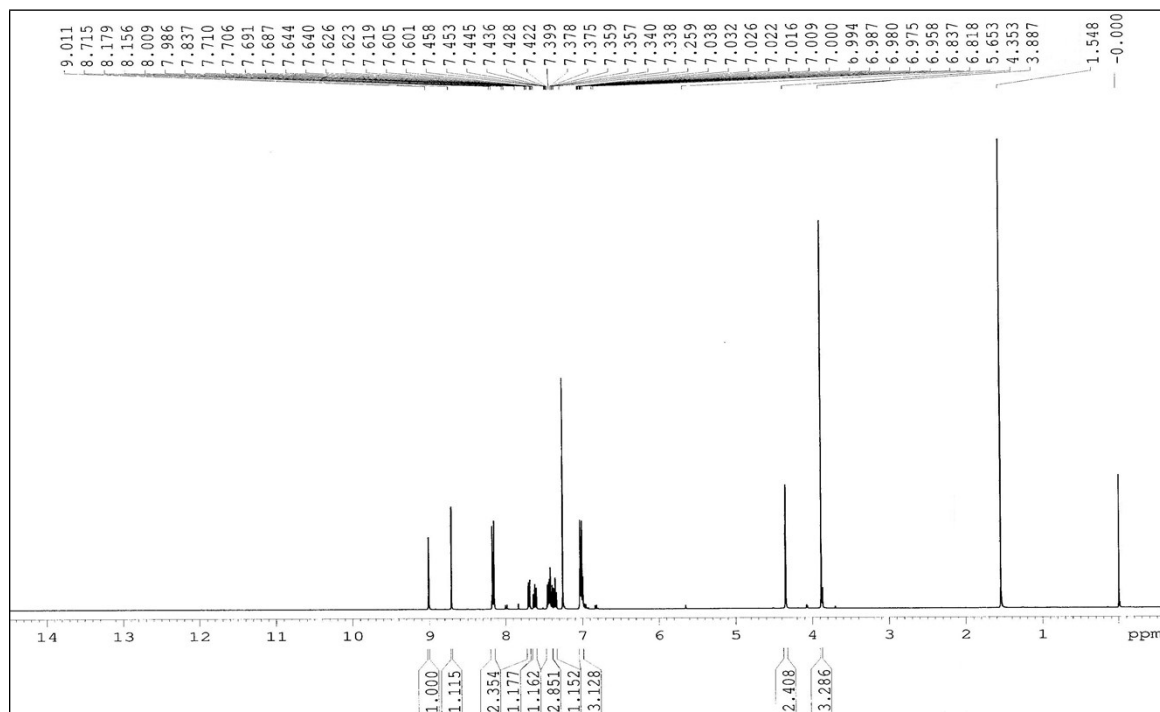

**<sup>13</sup>C NMR spectrum of compound (1b)**

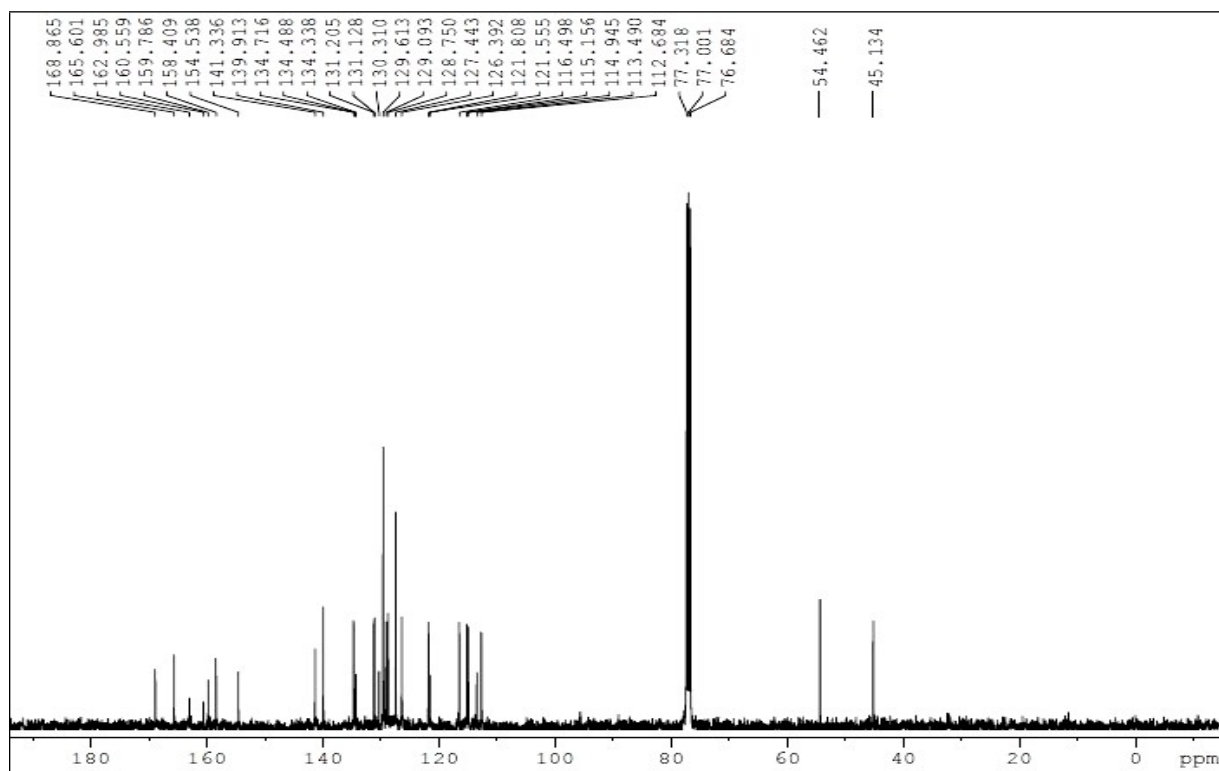

**<sup>1</sup>H NMR spectrum of compound (1c)**

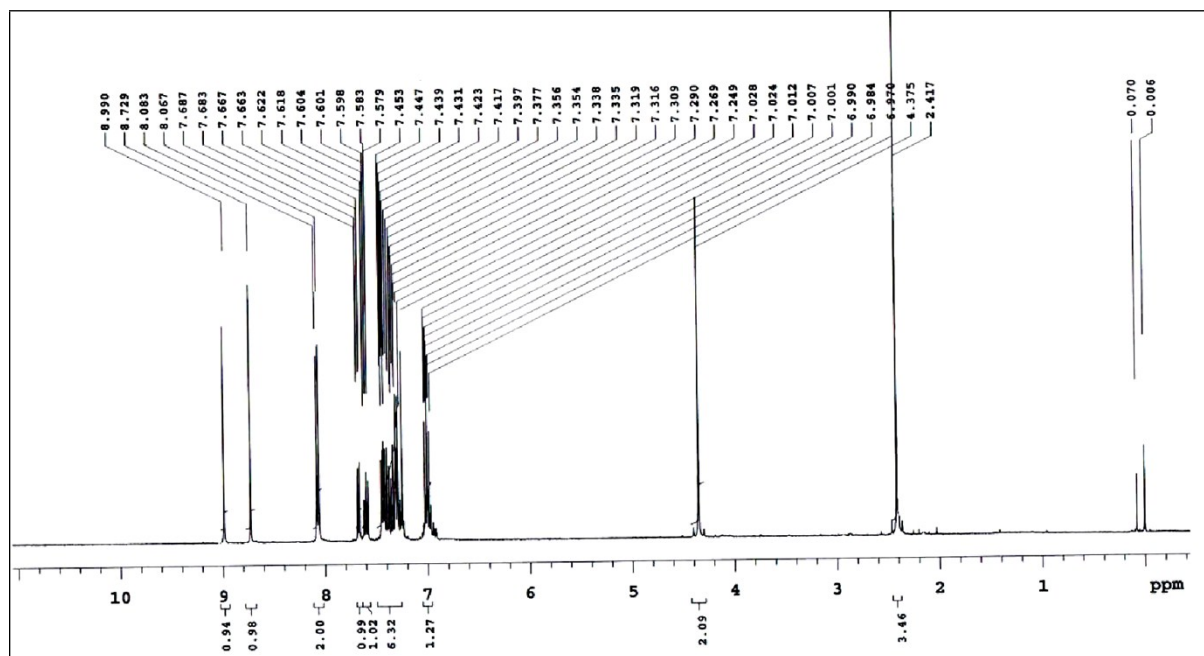

### <sup>13</sup>C NMR spectrum of compound (1c)

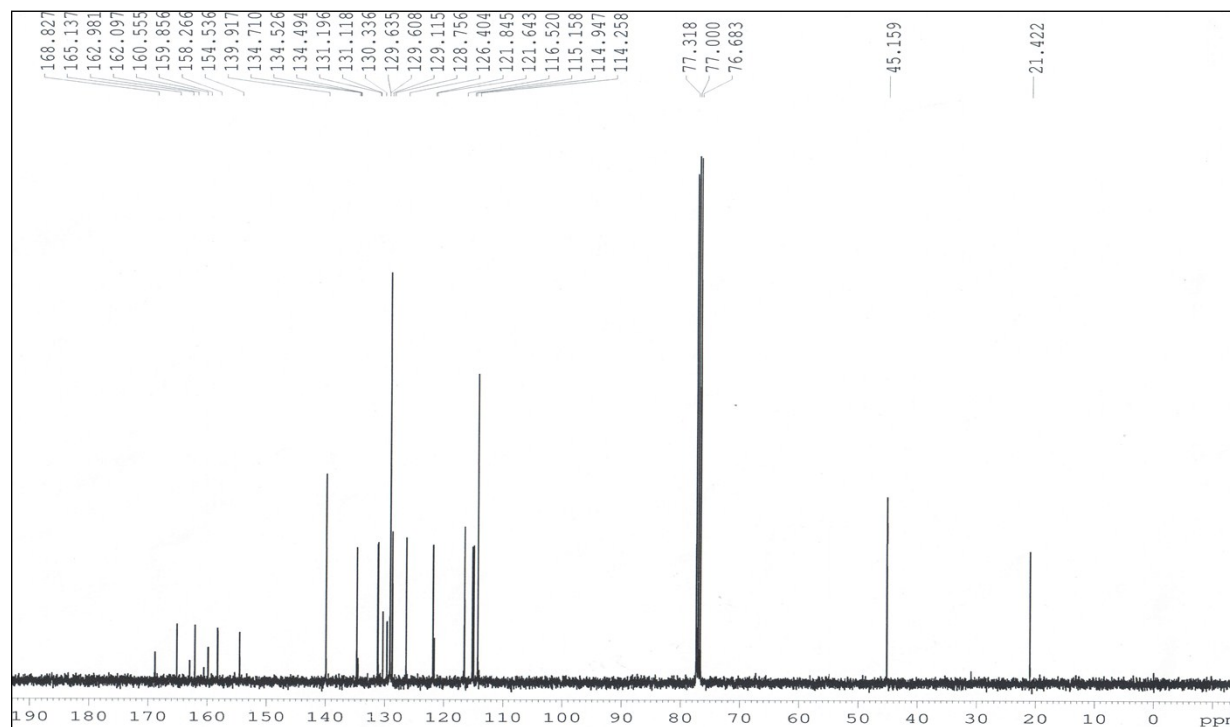

### <sup>1</sup>H NMR spectrum of compound (1d)

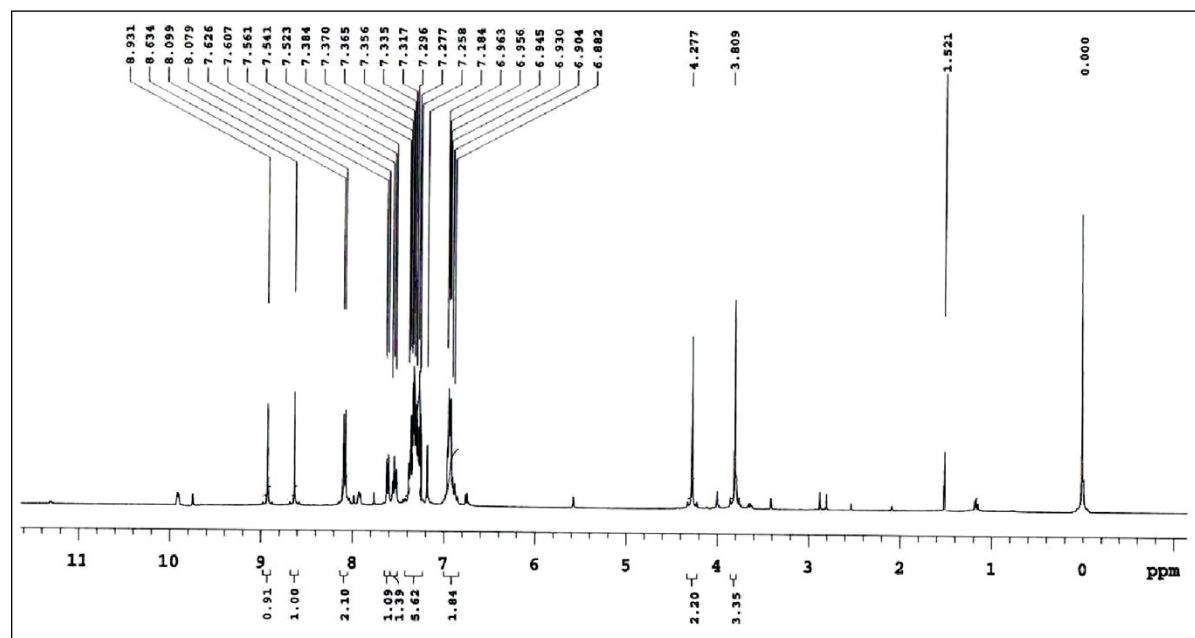

### <sup>13</sup>C NMR spectrum of compound (1d)

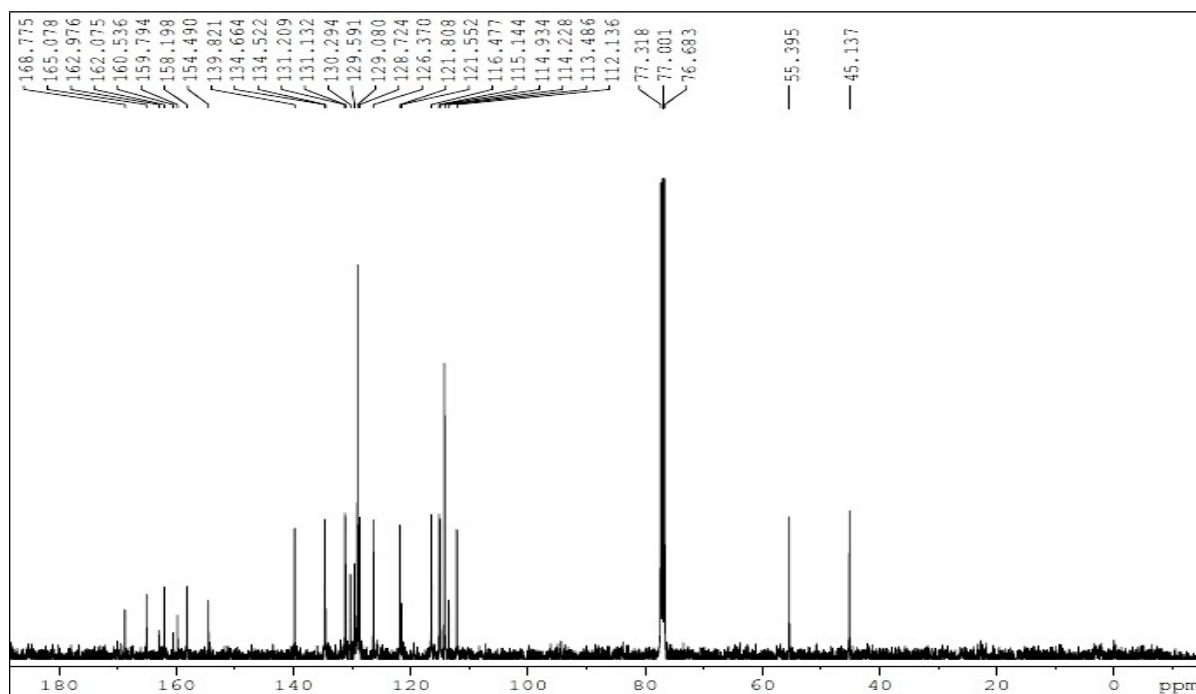

### <sup>1</sup>H NMR spectrum of compound (1e)

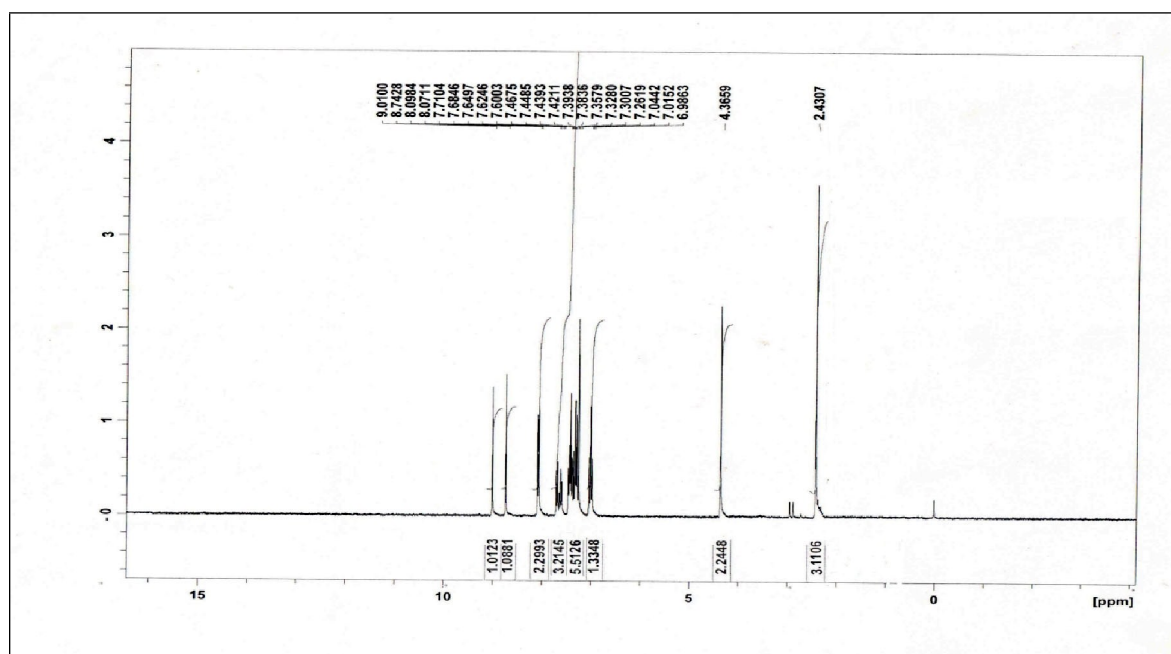

**<sup>13</sup>C NMR spectrum of compound (1e)**

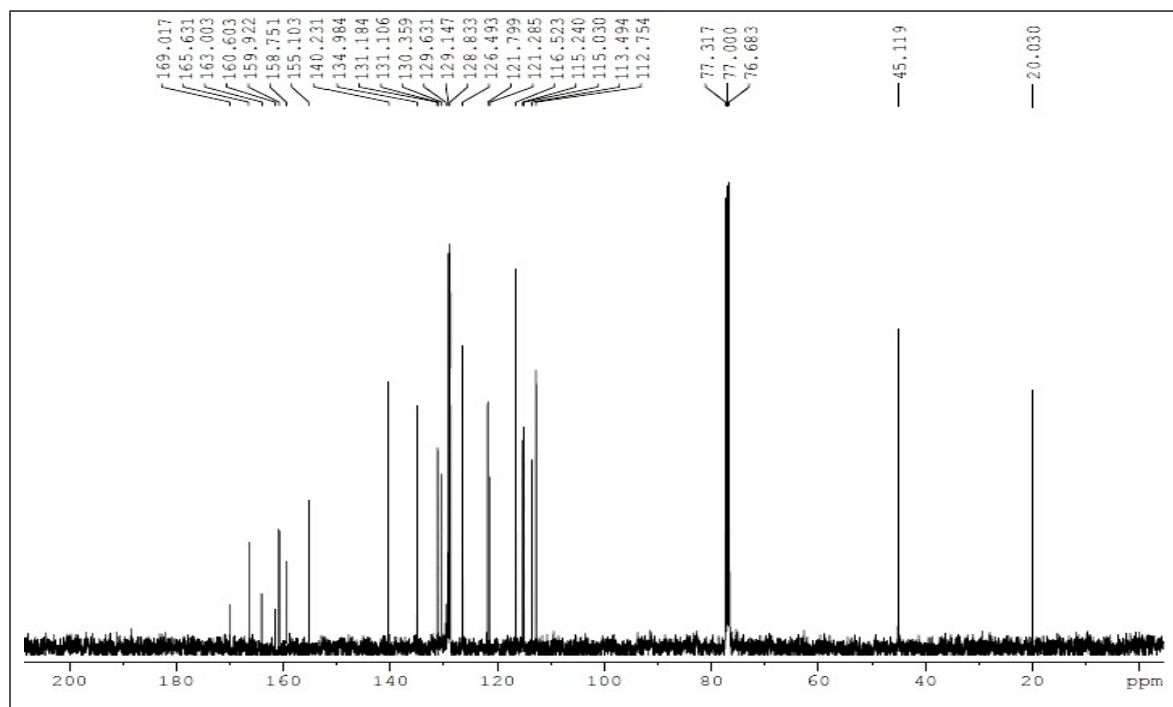

**<sup>1</sup>H NMR spectrum of compound (1f)**

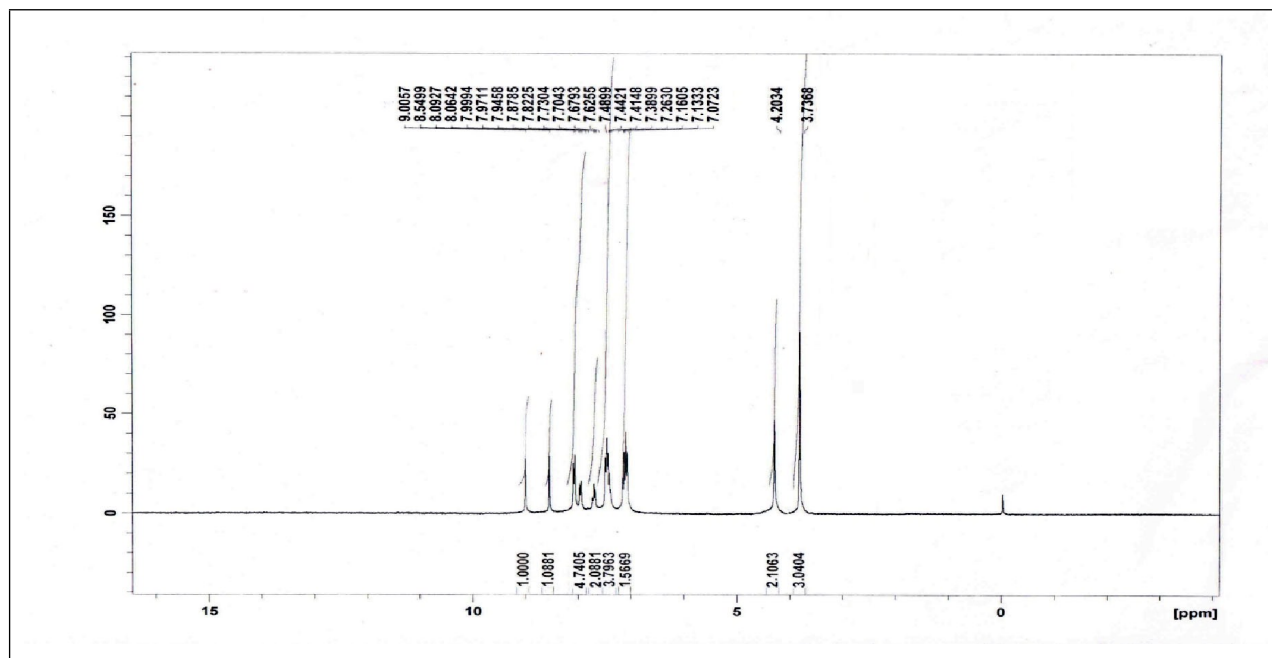

### <sup>13</sup>C NMR spectrum of compound (1f)

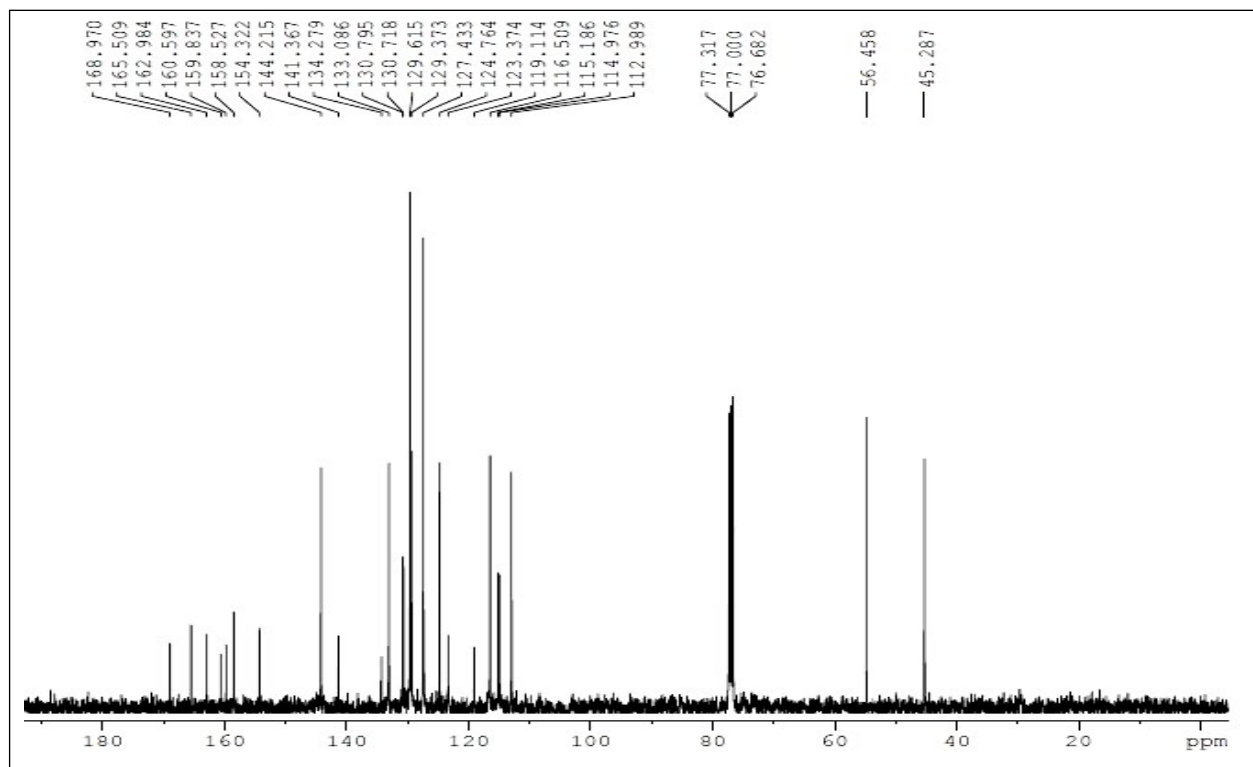

### <sup>1</sup>H NMR spectrum of compound (1g)

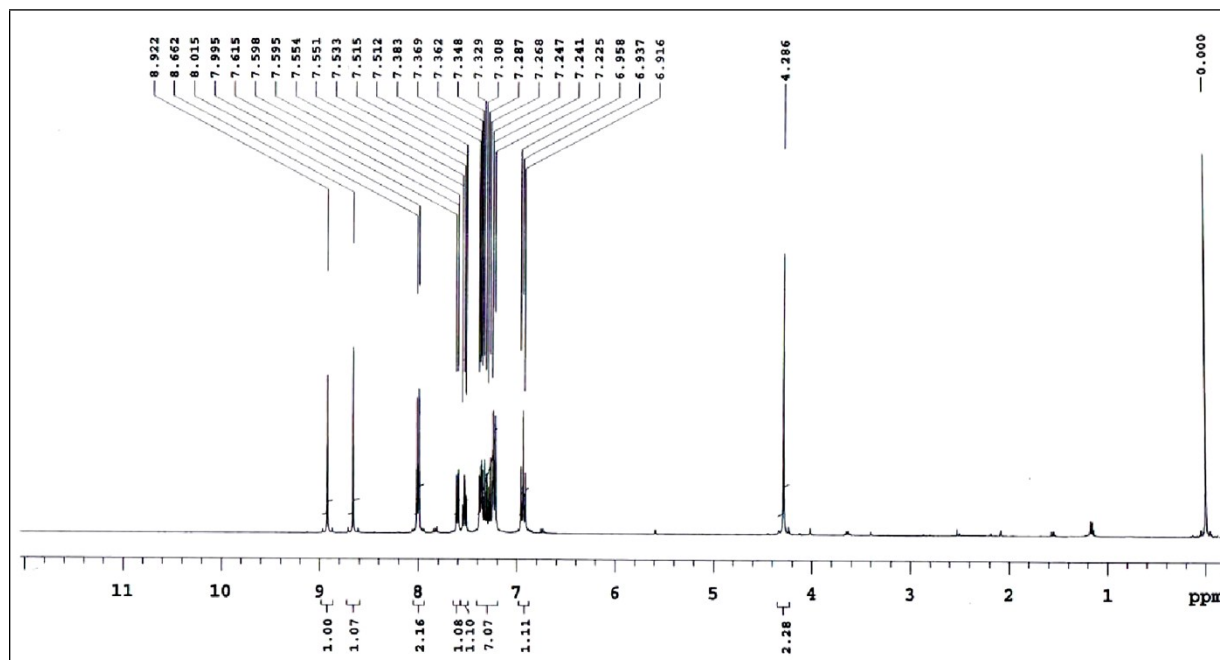



<sup>13</sup>C NMR spectrum of compound (1g)

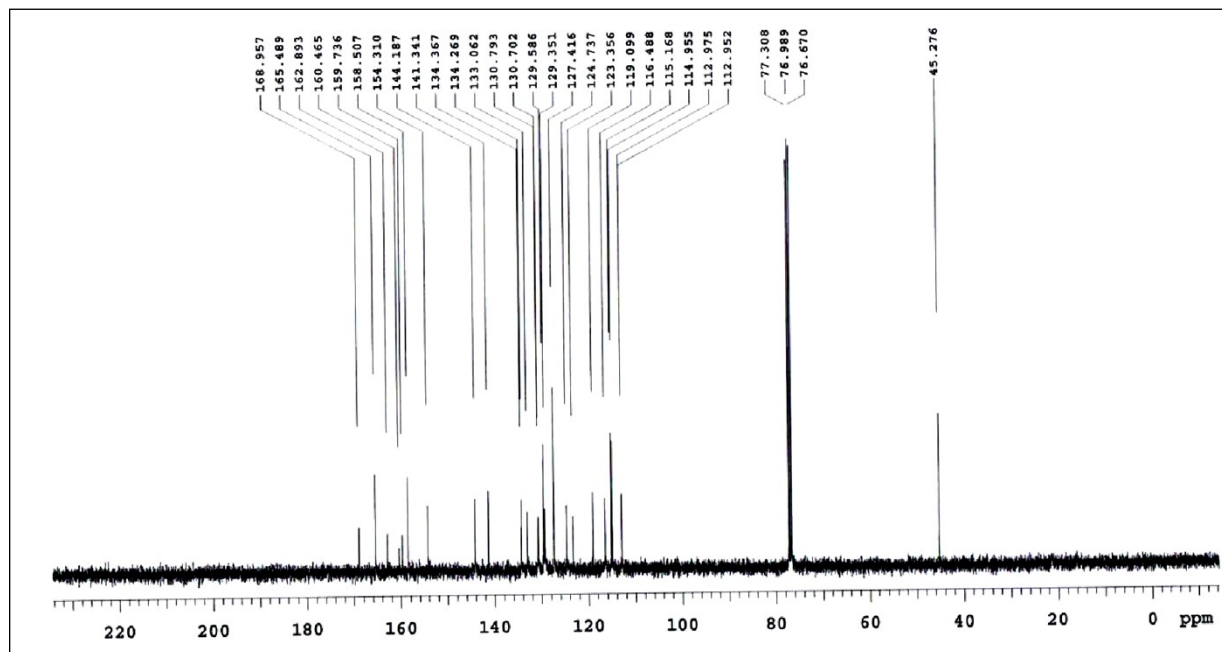

<sup>1</sup>H NMR spectrum of compound (1h)

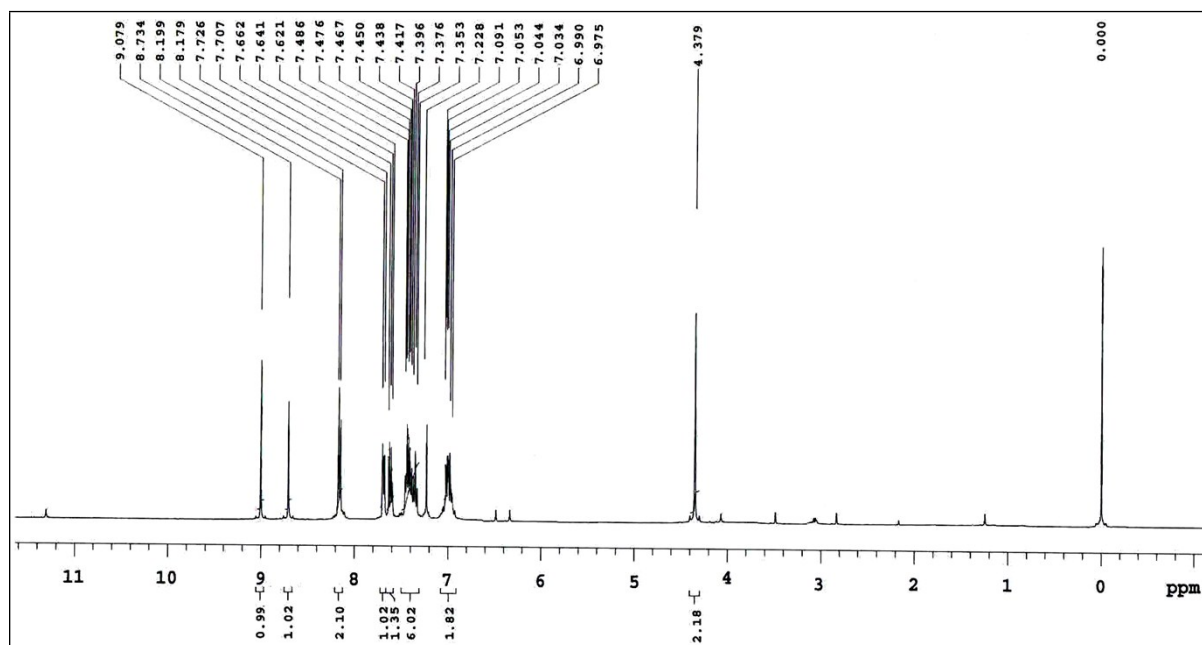

<sup>13</sup>C NMR spectrum of compound (1h)

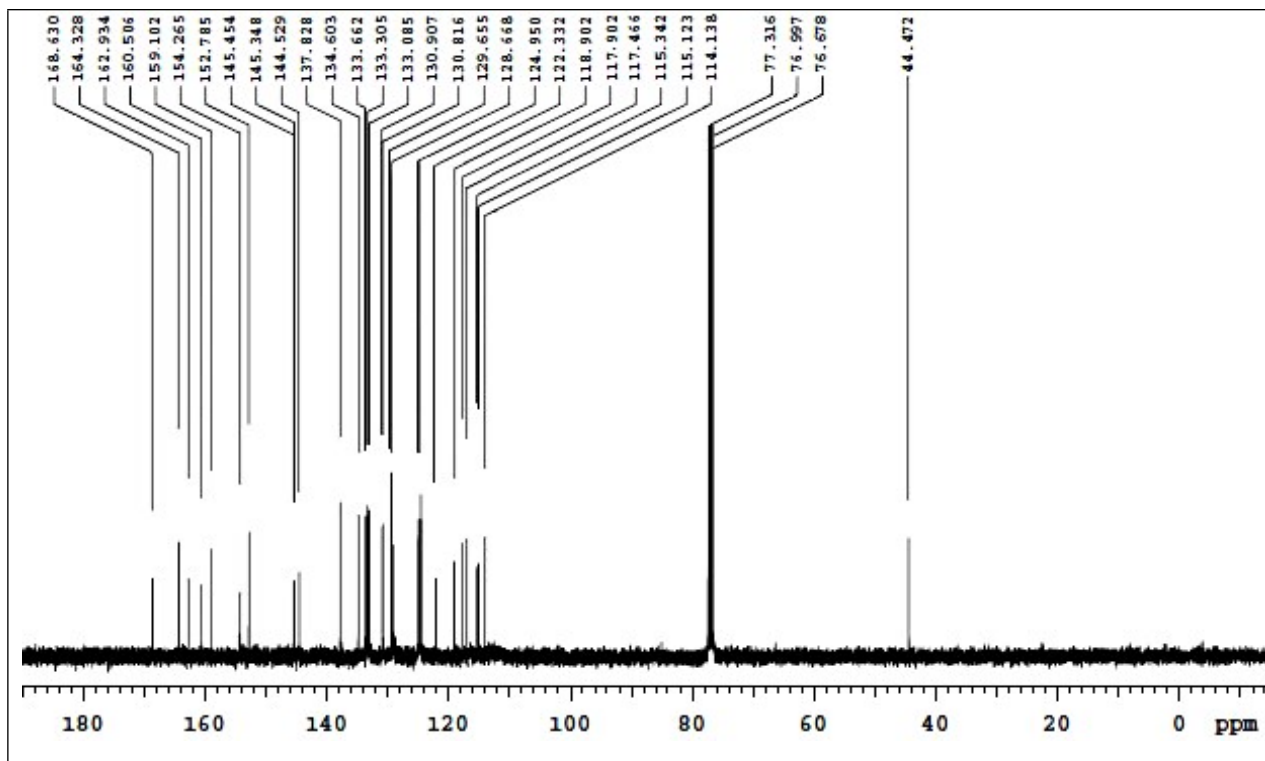

<sup>1</sup>H NMR spectrum of compound (1i)

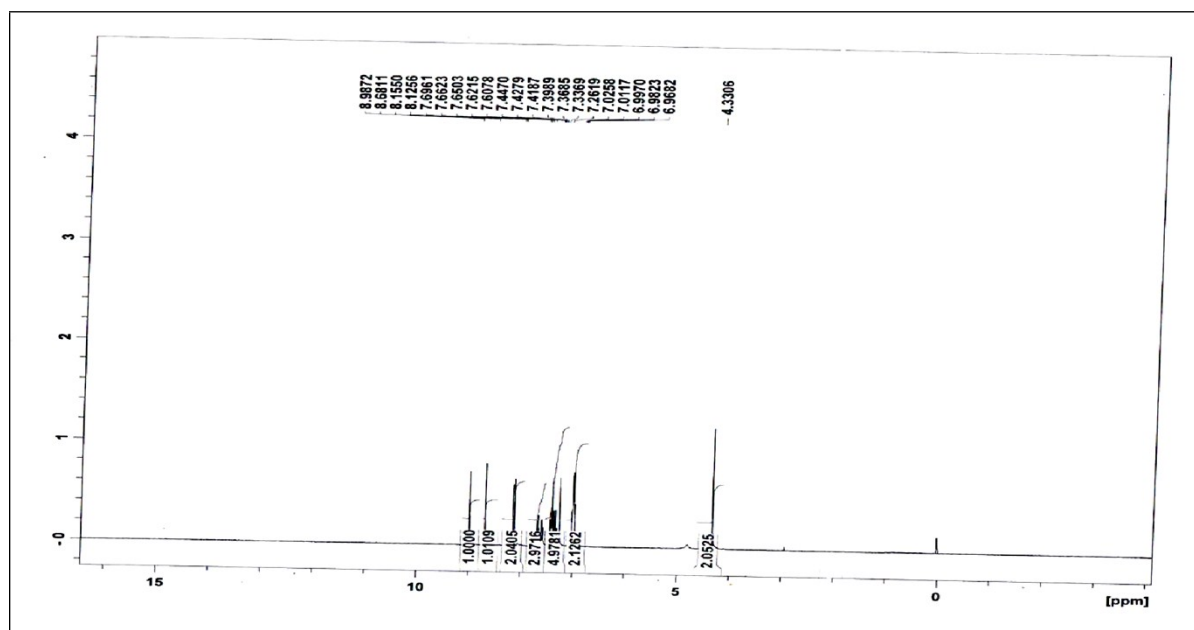

<sup>13</sup>C NMR spectrum of compound (1i)

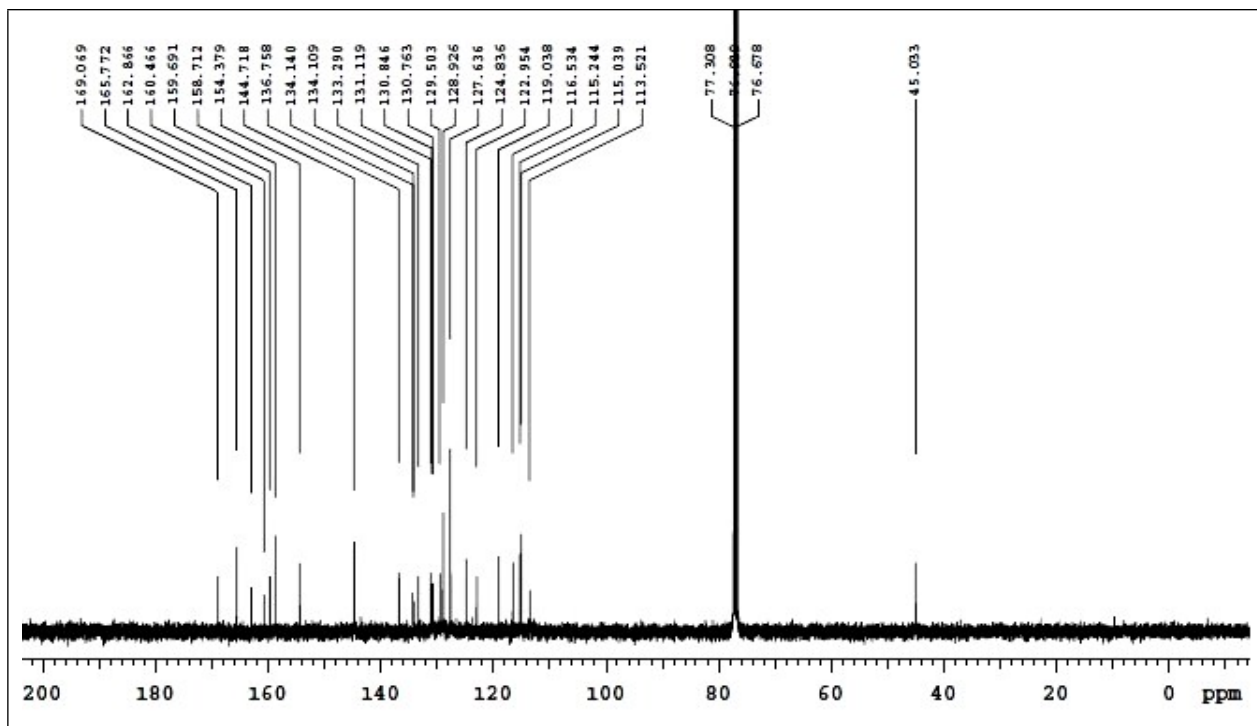

<sup>1</sup>H NMR spectrum of compound (1j)

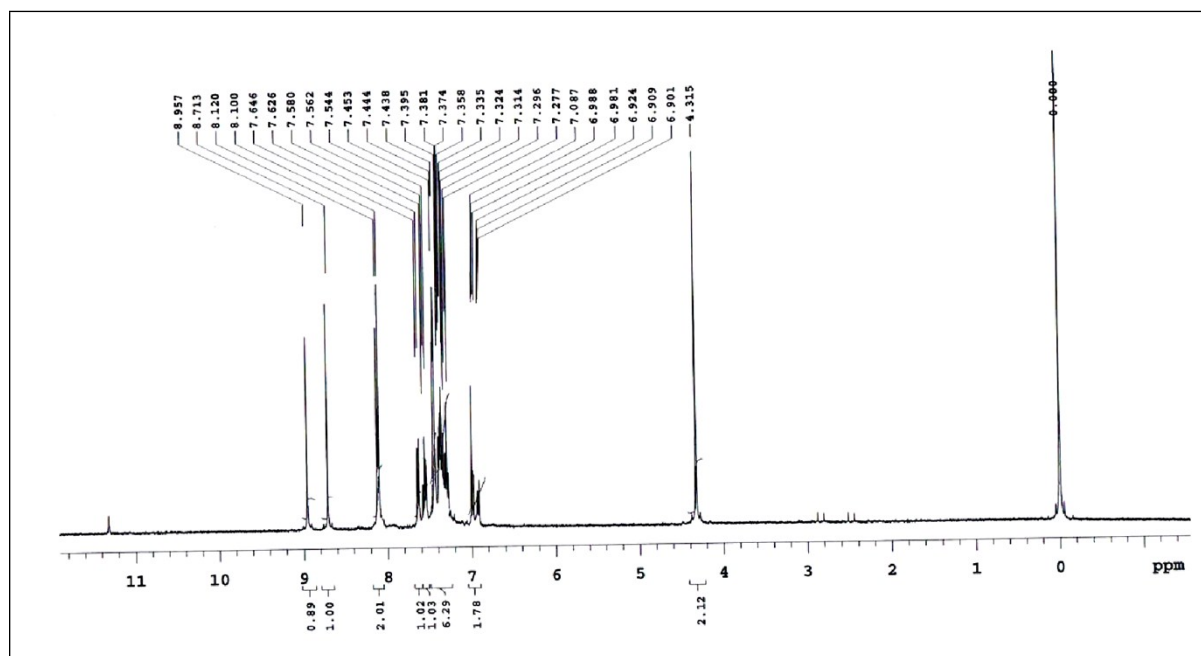

<sup>13</sup>C NMR spectrum of compound (1j)

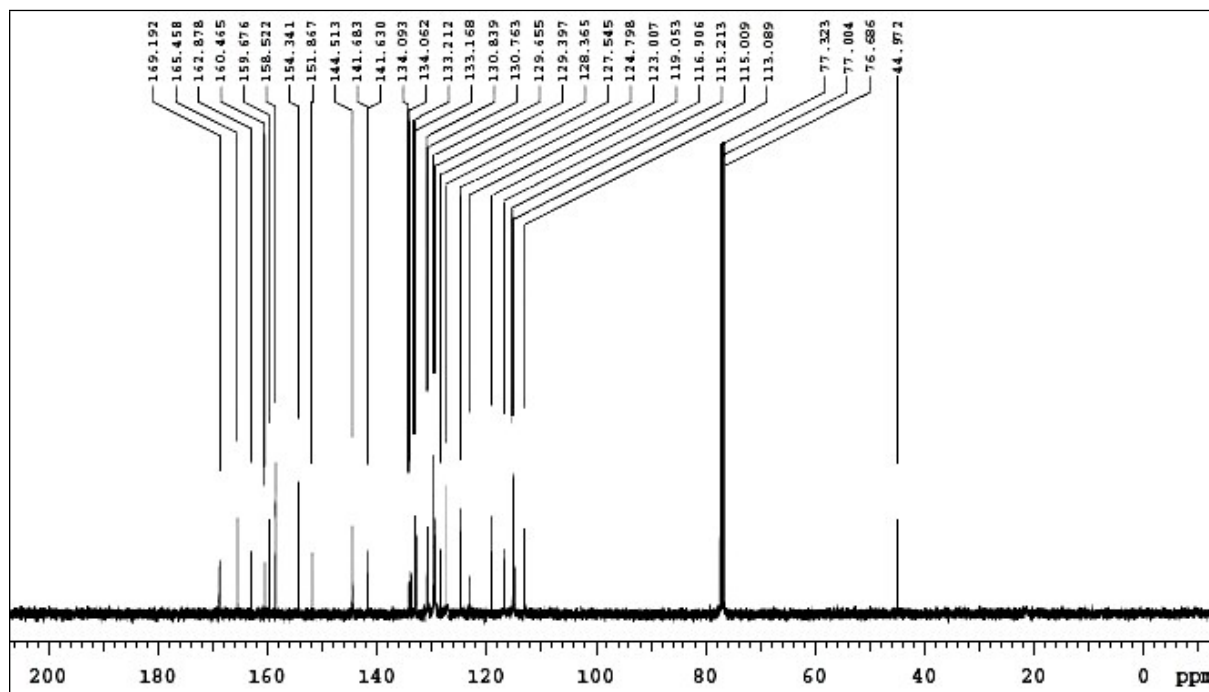

<sup>1</sup>H NMR spectrum of compound (1k)

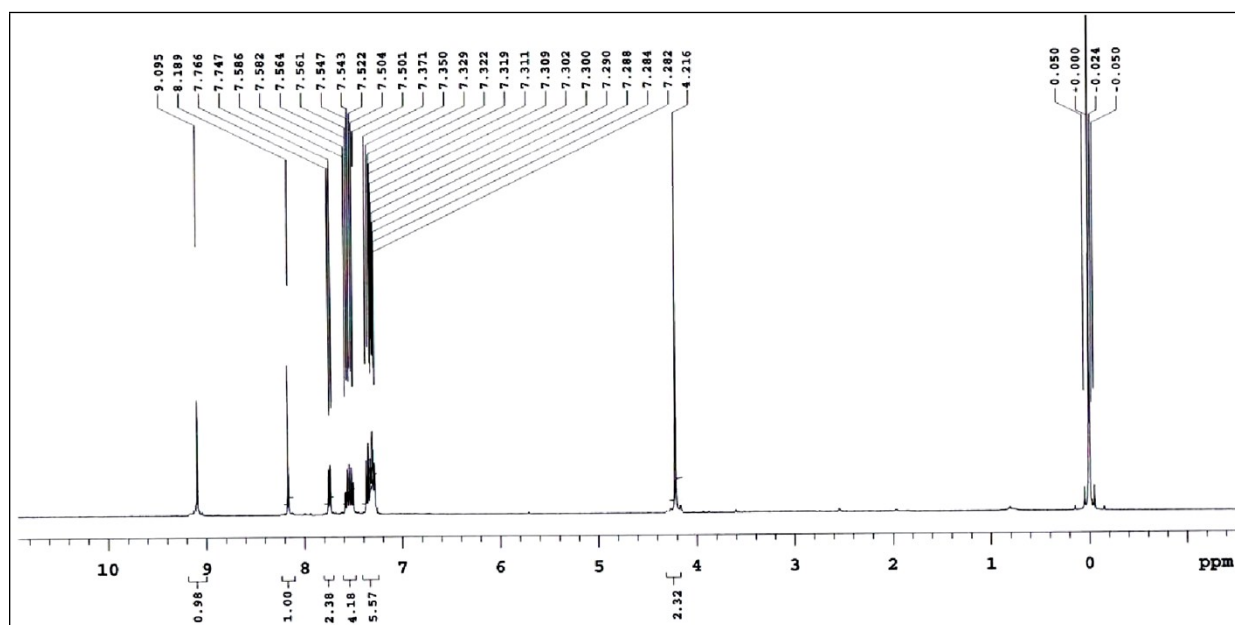

### <sup>13</sup>C NMR spectrum of compound (1k)

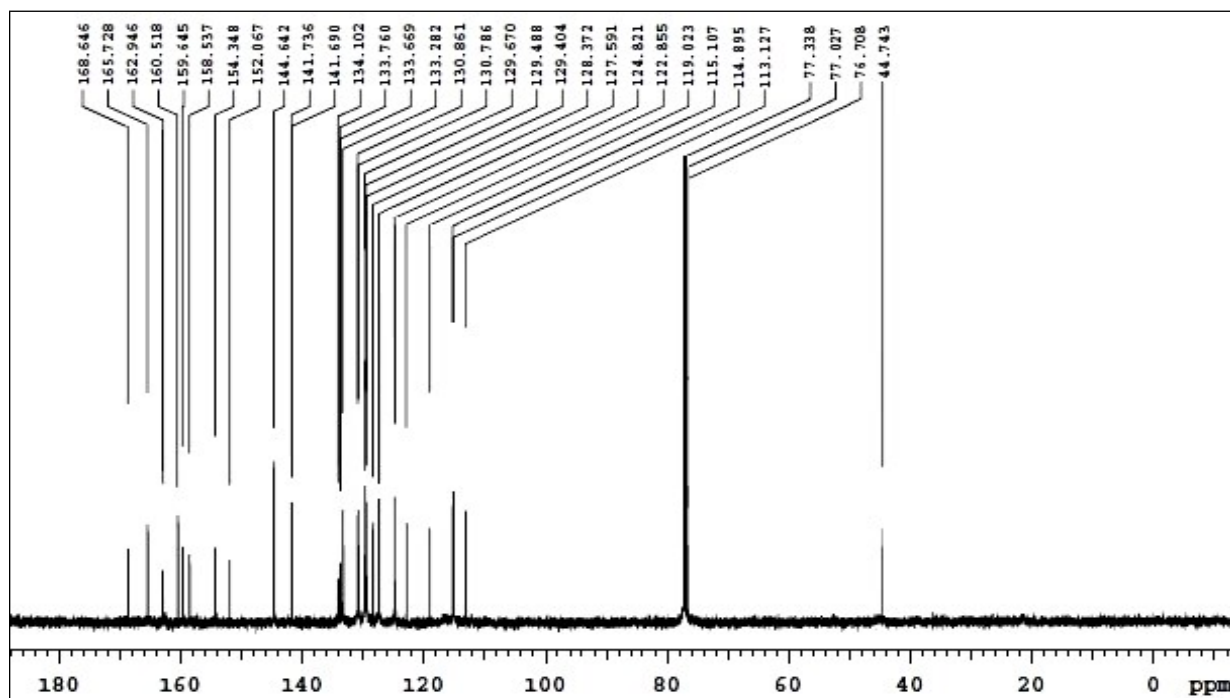

### <sup>1</sup>H NMR spectrum of compound (1l)

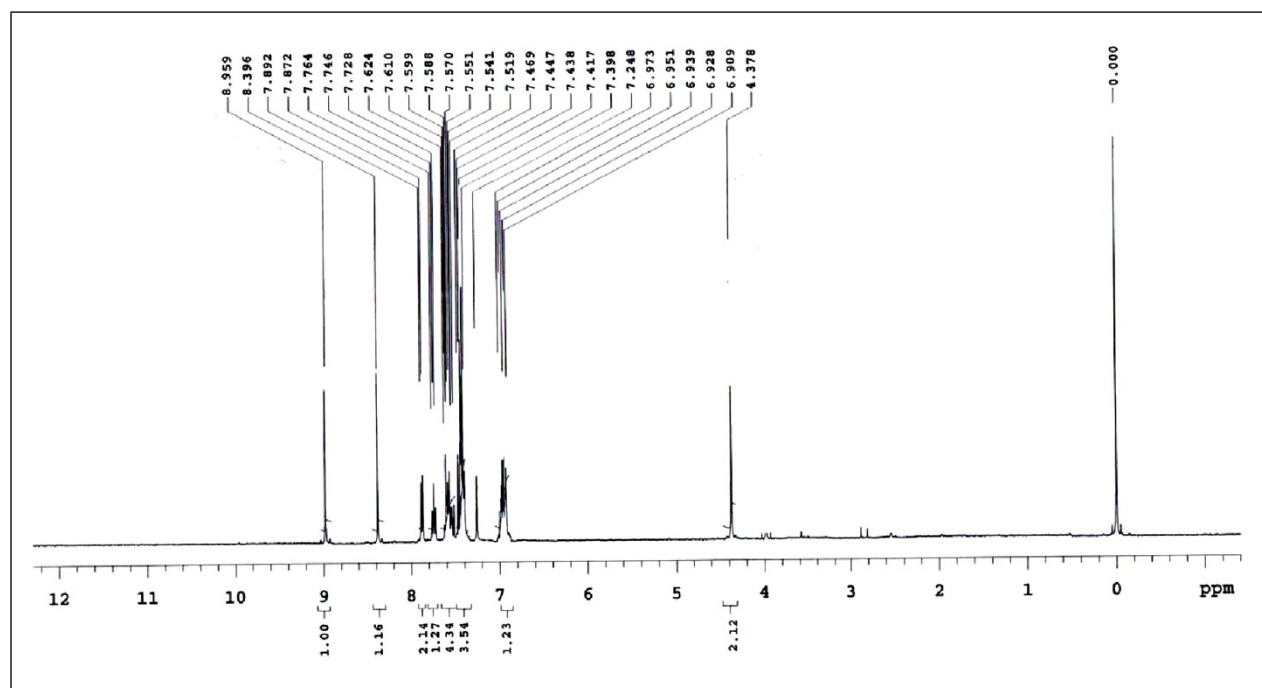

**<sup>13</sup>C NMR spectrum of compound (1)**

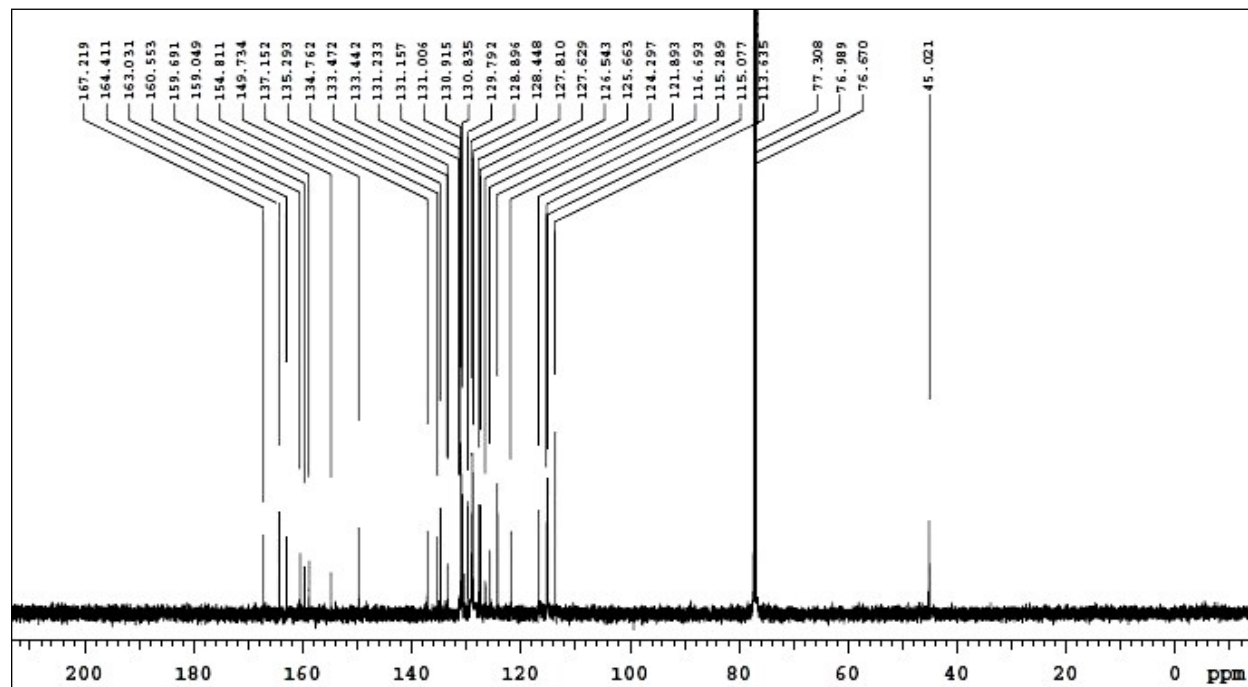

Supplement: c4ra12222d1.pdf [file c4ra12222d1.pdf]
